# Supplementary material
Source: PubMed Central journal article supplement (PMC4111105)
Supplement: NIHMS600699-supplement-SDC_1.pdf [file NIHMS600699-supplement-SDC_1.pdf]

## **Appendix. Participating Recruitment Sites**

Maternal Fetal Specialists, Atlanta (Daniel Eller, M.D.), Baylor College of Medicine (Anthony Johnson, D.O.), NJ Perinatal Associates/St. Barnabas Medical Center (Richard Miller, M.D.), Main Line Health and Women's Health Care Group of PA (Alan Donnenfeld, M.D.), Carnegie Imaging for Women PLLC, NY (Daniel Saltzman, MD), Phoenix Perinatal Associates (Rodney Edwards, M.D.), Maternal Fetal Medicine of Central PA (Terry Tressler, D.O.), Thomas Jefferson University (Stuart Weiner, M.D.), Fetal Diagnostic Center (Greggory DeVore, M.D.), Virtua Health System (Ronald Librizzi, D.O.), Christiana Care Health System (Anthony Sciscione, D.O.), San Francisco Perinatal Associates (James Goldberg, M.D.), University of Medicine and Dentistry, New Jersey–Robert Wood Johnson (Todd Rosen, M.D.), University of California, Irvine (Deborah Wing, M.D.), Vanderbilt Center for Women's Health (William Walsh, M.D.), Children's Hospital of Philadelphia (Mark Johnson, M.D.), Ohio State University Maternal Fetal Medicine (Richard O'Shaughnessy, M.D.), St. Vincent Women's Hospital (Maurice Eggleston, M.D., and James Sumners, M.D.), Englewood Hospital (Ying Chan, M.D.), University of Utah (Robert Silver, M.D.), and Magella Medical Group (Melissa Bush, M.D.).

Donnelly JC, Platt LD, Rebarber A, Zachary J, Grobman WA, and Wapner RJ. Association of copy number variants with specific ultrasonographically detected fetal anomalies. *Obstet Gynecol* 2014;124.

The authors provided this information as a supplement to their article.
