# Supplementary material
Source: PubMed Central journal article supplement (PMC4111105)
Supplement: NIHMS600699-supplement-SDC_2.pdf [file NIHMS600699-supplement-SDC_2.pdf]

## Appendix 2. Association of Copy Number Variants With Specific Ultrasonographically Detected Fetal Anomalies

### Ultrasound Anomaly Details

- Abdominal wall
  - Bladder exstrophy
  - Body-stalk anomaly
  - Cloacal exstrophy
  - Gastroschisis
  - Omphalocele
  - Other:
  
- CNS
  - Absent cerebellar vermis
  - Agenesis of corpus callosum
  - Anencephaly
  - Arachnoid cyst
  - Cerebellar hypoplasia
  - Chiari malformation
  - Dandy-Walker malformation
  - Encephalocele
    - Anterior
    - Posterior
  - Holoprosencephaly
  - Hydranencephaly
  - Iniencephaly
  - Lissencephaly
  - Parenchymal defect
  - Posterior fossa cyst
  - Spina bifida
  - Vascular anomaly
  - Ventriculomegaly/Hydrocephaly
    - Unilateral
    - Mild (10-12mm)
    - Moderate (13-15mm)
    - Severe (>15mm)
  - Bilateral
    - Mild (10-12mm)
    - Moderate (13-15mm)
    - Severe (>15mm)
  - Other:
  
- Ear
  - Outer ear malformation
    - Unilateral
    - Bilateral
  - Other:
  
- Effusion
  - Hydrops
  - Single effusion only
    - Ascites
    - Pericardial effusion
    - Pleural effusion
    - Skin edema

Donnelly JC, Platt LD, Rebarber A, Zachary J, Grobman WA, and Wapner RJ. Association of copy number variants with specific ultrasonographically detected fetal anomalies. *Obstet Gynecol* 2014;124.

The authors provided this information as a supplement to their article.

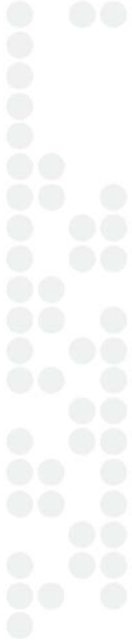

- Other:
- Fac
  - Eye anomalies
    - Cyclopia
    - Hypertelorism
    - Hypotelorism
    - Microphthalmia
    - Other:
  - Facial tumor
  - Lip - Cleft
    - Unilateral
    - Midline
    - Bilateral
  - Nose
    - Absent / hypoplastic nose bone
    - Depressed nasal bridge
  - Palate – Cleft
  - Profile
    - Frontal bossing
    - Micrognathia
    - Profile Flat
  - Other:
- Fetal growth restriction
  - Expected fetal weight
    - < 3<sup>rd</sup> percentile
    - < 5<sup>th</sup> percentile
    - < 10<sup>th</sup> percentile

- Gastro-intestinal tract
  - Abdominal cyst
  - Anal atresia
  - Bowel
    - Large obstruction
      - Meconium ileus
    - Small obstruction
  - Duodenal atresia
  - Liver nodules
  - Situs inversus
  - Stomach bubble
    - Enlarged
    - Small/absent
  - Other:

- Genitalia -
  - Ambiguous genitalia
  - Hydrocele
  - Hydrometrocolpus
  - Hypospadias
  - Micropenis
  - Other:

- Head shape -
  - Cloverleaf skull
  - Craniosynostosis

Donnelly JC, Platt LD, Rebarber A, Zachary J, Grobman WA, and Wapner RJ. Association of copy number variants with specific ultrasonographically detected fetal anomalies. *Obstet Gynecol* 2014;123.

The authors provided this information as a supplement to their article.

- Macrocephaly
- Microcephaly
- Strawberry sign
- Other:

Heart -

- Abnormal 4-chamber view
- Abnormal outflow tracts
- Anomalous pulmonary venous return
- ASD
- AV canal
- Coarctation
- Dextrocardia
- Dilatation
- Ebsteins anomaly
- Heart tumor
- Hypoplastic left heart
- Hypoplastic right heart
- Interrupted aortic arch
- Pulmonary stenosis
- Tetralogy of Fallot
- Transposition
- Truncus Arteriosus
- VSD
- Other:

Neck -

- Cystic hygroma
- Nuchal fold  $\geq 6\text{mm}$
- Nuchal translucency  (in mm)
- Teratoma
- Other:

Renal tract -

- Abnormal adrenal glands
  - Hemorrhage
  - Tumor
- Bladder
  - Bladder Collapsed
  - Dilated tense
  - Dilated floppy
  - Ureterocele
- Duplex system
  - Unilateral
  - Bilateral
- Hydronephrosis
  - Mild (AP 5-10mm)
  - Moderate to severe (AP > 10mm)
- Kidney
  - Echogenic kidney
    - Unilateral
    - Bilateral
  - Horseshoe kidney
  - Large kidney
    - Unilateral
    - Bilateral
  - Multicystic kidney

Donnelly JC, Platt LD, Rebarber A, Zachary J, Grobman WA, and Wapner RJ. Association of copy number variants with specific ultrasonographically detected fetal anomalies. *Obstet Gynecol* 2014;123.

The authors provided this information as a supplement to their article.



- Unilateral
- Bilateral
- Pelvic kidney
- Polycystic kidney
  - Unilateral
  - Bilateral
- Small kidney
  - Unilateral
  - Bilateral
- Renal agenesis
  - Unilateral
  - Bilateral
- Urethra
  - Absent
  - Dilated/Valves
- Other:

Skeletal -

- Skeletal dysplasia  
(if yes, check individual components below)

Foot

- Absent  Left  Right  Both
- Oligodactyly  Left  Right  Both
- Polydactyly  Left  Right  Both
- Rocker bottom foot  Left  Right  Both
- Sandal gap  Left  Right  Both
- Split foot  Left  Right  Both
- Syndactyly  Left  Right  Both
- Other:

Hand

- Absent  Left  Right  Both
- Brachydactyly  Left  Right  Both
- Clinodactyly  Left  Right  Both
- Oligodactyly  Left  Right  Both
- Overlapping fingers  Left  Right  Both
- Polydactyly  Left  Right  Both
- Split hand  Left  Right  Both
- Syndactyly  Left  Right  Both
- Other:

Joints

- Ankle
  - Fixed extended  Left  Right  Both
  - Fixed flexed  Left  Right  Both
  - Talipes  Left  Right  Both
- Elbow
  - Fixed extended  Left  Right  Both
  - Fixed flexed  Left  Right  Both
- Knee
  - Fixed extended  Left  Right  Both
  - Fixed flexed  Left  Right  Both
- Wrist
  - Fixed extended  Left  Right  Both
  - Fixed flexed  Left  Right  Both
- Other:

Long bones

Donnelly JC, Platt LD, Rebarber A, Zachary J, Grobman WA, and Wapner RJ. Association of copy number variants with specific ultrasonographically detected fetal anomalies. *Obstet Gynecol* 2014;123.

The authors provided this information as a supplement to their article.



- Femur
  - Absent  Left  Right  Both
  - Bowed  Left  Right  Both
  - Short  Left  Right  Both
- Fibula
  - Absent  Left  Right  Both
  - Bowed  Left  Right  Both
  - Short  Left  Right  Both
- Humerus
  - Absent  Left  Right  Both
  - Bowed  Left  Right  Both
  - Short  Left  Right  Both
- Radius
  - Absent  Left  Right  Both
  - Bowed  Left  Right  Both
  - Short  Left  Right  Both
- Tibia
  - Absent  Left  Right  Both
  - Bowed  Left  Right  Both
  - Short  Left  Right  Both
- Ulna
  - Absent  Left  Right  Both
  - Bowed  Left  Right  Both
  - Short  Left  Right  Both
- Other:

Spine -

- Hemivertebrae
- Kyphosis
- Sacral agenesis
- Sacrococcygeal teratoma
- Scoliosis
- Sirenomelia
- Other:

Thorax -

- Congenital diaphragmatic hernia
- Cystic lung lesion
- Hydrothorax
- Hypoplastic thorax
- Short ribs
- Other:

Soft markers

- Choroid plexus cyst(s)
- Echogenic bowel
- Echogenic intracardiac focus
- Nuchal Translucency of 3.0-3.4 mm
- Other:

Amniotic fluid anomaly -

- Oligohydramnios
- Polyhydramnios

Placental anomaly -

- Edema

Donnelly JC, Platt LD, Rebarber A, Zachary J, Grobman WA, and Wapner RJ. Association of copy number variants with specific ultrasonographically detected fetal anomalies. *Obstet Gynecol* 2014;123.

The authors provided this information as a supplement to their article.

- 
- Tumor
  - Umbilical cord anomaly -
    - 2 vessel cord
    - Velamentous cord insertion

Full list of ultrasound detected anomalies broken down by category and subcategory as entered into online database.

Donnelly JC, Platt LD, Rebarber A, Zachary J, Grobman WA, and Wapner RJ. Association of copy number variants with specific ultrasonographically detected fetal anomalies. *Obstet Gynecol* 2014;123.

The authors provided this information as a supplement to their article.
