# Supplementary material
Source: PubMed Central journal article supplement (PMC4111105)
Supplement: NIHMS600699-supplement-SDC_3.pdf [file NIHMS600699-supplement-SDC_3.pdf]

### Appendix 3. Association of Copy Number Variants With Specific Ultrasonographically Detected Fetal Anomalies

| Deletion    | Gestational Age (Weeks) | ISCN Nomenclature                             | US Anomalies                                                                                                                                               |
|-------------|-------------------------|-----------------------------------------------|------------------------------------------------------------------------------------------------------------------------------------------------------------|
| Duplication | 11                      | arr 1q21.1(144,696,283-146,374,546)x3 mat     | Nuchal translucency - 3.5 mm; Bladder, Dilated tense; Two vessel cord                                                                                      |
| Duplication | 27                      | arr 1q21.1(144,083,908-144,643,814)x3 mat     | AV canal; Oligohydramnios                                                                                                                                  |
| Duplication | 20                      | arr 1q21.1(144,083,907-144,723,881)x3 mat     | Overlapping fingers - Bilateral; Elbow, Fixed flexed - Bilateral; Knee, Fixed extended - Bilateral; Thorax, other                                          |
| Duplication | 20                      | arr 2q13(111,085,100-112,782,390)x3 pat       | VSD; Bilateral Ventriculomegaly - Present Uncoded; Echogenic bowel                                                                                         |
| Deletion    | 23                      | arr 3p14.1p13(67,917,266-72,754,608)x1 dn     | Oligohydramnios; Absent cerebellar vermis; Posterior fossa cyst; Bilateral Ventriculomegaly - Mild; Absent/hypoplastic nose bone; Femur, Short - Bilateral |
| Duplication | 20                      | arr 3p26.3(832,458-1,403,386)x3 mat           | Bilateral Ventriculomegaly - Moderate                                                                                                                      |
| Duplication | 18                      | arr 4q13.2q21.1(66,871,838-77,744,787)x3 pat  | Micrognathia; Head, other; Echogenic bowel; Two vessel cord                                                                                                |
| Deletion    | 19                      | arr 5q35.1q35.2(171,483,988-176,409,787)x1 dn | Cleft Lip - Unilateral; Cleft Palate                                                                                                                       |
| Duplication | 19                      | arr 5p13.2(36,984,535-37,151,099)x3 mat       | VSD; Congenital diaphragmatic hernia                                                                                                                       |
| Deletion    | 12                      | arr 6q23.3q24.1(136,521,187-139,410,871)x1 dn | Cystic hygroma; Nuchal translucency                                                                                                                        |
| Deletion    | 20                      | arr 7q11.23(72,404,248-73,976,981)x1 dn       | Fetal growth restriction - < 10th percentile; Echogenic bowel                                                                                              |
| Duplication | 23                      | arr 8p22p21.3(17,905,977-19,482,435)x3 mat    | Oligohydramnios; Echogenic kidney - Bilateral                                                                                                              |

Donnelly JC, Platt LD, Rebarber A, Zachary J, Grobman WA, and Wapner RJ. Association of copy number variants with specific ultrasonographically detected fetal anomalies. *Obstet Gynecol* 2014;124.

The authors provided this information as a supplement to their article.

| <b>Deletion</b> | <b>Gestational Age (Weeks)</b> | <b>ISCN Nomenclature</b>                        | <b>US Anomalies</b>                                                                                                                                                |
|-----------------|--------------------------------|-------------------------------------------------|--------------------------------------------------------------------------------------------------------------------------------------------------------------------|
| Duplication     | 18                             | arr 8q11.1(46,966,687-47,976,420)x3 pat         | Hypoplastic right heart                                                                                                                                            |
| Deletion        | 21                             | arr 8p23.1(11,578,132-11,789,207)x1 dn          | Abnormal outflow tracts                                                                                                                                            |
| Deletion        | 19                             | arr 8q12.1(61,104,853-62,025,350)x1 dn          | Abnormal outflow tracts                                                                                                                                            |
| Duplication     | 19                             | arr 8p23.2(3,674,351-5,938,253)x3 pat           | Nuchal fold more or equal to 6mm; Echogenic intracardiac focus; Echogenic bowel                                                                                    |
| Duplication     | 12                             | arr 8p22(13,400,615-14,711,717)x3 mat           | Abdominal cyst; Cystic hygroma; Nuchal translucency                                                                                                                |
| Deletion        | 32                             | arr 10q21.1(53,697,770-59,847,798)x1 pat        | Bilateral Ventriculomegaly - Moderate                                                                                                                              |
| Deletion        | 22                             | arr 10q21.1(54,376,822-56,475,582)x1 mat        | Heart, other; Omphalocele; Chiari malformation; Bilateral Ventriculomegaly - Present Uncoded; Fetal growth restriction - < 5th percentile; Kyphosis; Thorax, other |
| Duplication     | 20                             | arr 10q26.13q26.2(125,730,437-129,696,364)x3 dn | Lissencephaly; Microcephaly                                                                                                                                        |
| Deletion        | 23                             | arr 11q24.2q25(124,104,318-134,373,618)x1 dn    | AV canal; Fetal growth restriction - < 10th percentile; Profile Flat; Talipes - Bilateral                                                                          |
| Deletion        | 25                             | arr 12q24.33(131,718,039-132,287,718)x1 mat     | Heart, other; Single effusion - Skin Edema; Fetal growth restriction - < 5th percentile                                                                            |
| Deletion        | 22                             | arr 14q22.1(50,309,556-51,739,266)x1 mat        | Cleft Lip - Unilateral; Cleft Palate; Two vessel cord                                                                                                              |
| Deletion        | 27                             | arr 14q32.2q32.31(99,465,564-100,574,047)x1 dn  | Fetal growth restriction - < 10th percentile                                                                                                                       |
| Duplication     | 11                             | arr 15q13.3(29,817,814-30,226,375)x3 mat        | Nuchal translucency - 4.2 mm                                                                                                                                       |
| Duplication     | 20                             | arr 15q13.3(29,817,814-30,297,358)x3 pat        | Hydrops, Ascites; Hydrops, Pericardial effusion; Hydrops, Pleural effusion; Hydrops, Skin edema                                                                    |

Donnelly JC, Platt LD, Rebarber A, Zachary J, Grobman WA, and Wapner RJ. Association of copy number variants with specific ultrasonographically detected fetal anomalies. *Obstet Gynecol* 2014;124.

The authors provided this information as a supplement to their article.

| Deletion    | Gestational Age (Weeks) | ISCN Nomenclature                                                              | US Anomalies                                                                                                                                                                                                                                                                      |
|-------------|-------------------------|--------------------------------------------------------------------------------|-----------------------------------------------------------------------------------------------------------------------------------------------------------------------------------------------------------------------------------------------------------------------------------|
| Deletion    | 34                      | arr 16p13.11p12.3(15,311,952-18,539,483)x1 dn                                  | Abnormal outflow tracts; Hypoplastic left heart; Situs inversus                                                                                                                                                                                                                   |
| Deletion    | 19                      | arr 16p12.1(21,744,792-22,315,572)x1 pat                                       | Hypoplastic left heart; Chiari malformation; Spina bifida; Bilateral Ventriculomegaly - Mild                                                                                                                                                                                      |
| Duplication | 19                      | arr 16p13.11p12.3(15,311,952-18,048,552)x3 pat                                 | Hypoplastic left heart; Congenital diaphragmatic hernia                                                                                                                                                                                                                           |
| Duplication | 21                      | arr 16p13.11(14,805,289-16,203,401)x3 pat                                      | Cerebellar hypoplasia; Ventriculomegaly/Hydrocephaly; Single effusion - Skin Edema; Profile Flat; Stomach bubble - Small; Strawberry sign; Nuchal fold more or equal to 6mm; Overlapping fingers - Bilateral; Elbow, Fixed extended - Bilateral; Knee, Fixed extended - Bilateral |
| Deletion    | 19                      | arr 16p13.11p12.3(15,389,422-18,634,733)x1 dn                                  | Fetal growth restriction - < 10th percentile; Talipes - Bilateral; Fibula, Absent - Bilateral                                                                                                                                                                                     |
| Deletion    | 17                      | arr 16p13.11(14,817,705-16,679,871)x1 mat                                      | VSD                                                                                                                                                                                                                                                                               |
| Deletion    | 13                      | arr 16p11.2(29,238,063-30,098,209)x1 dn                                        | Nuchal translucency - 4.6 mm                                                                                                                                                                                                                                                      |
| Deletion    | 20                      | arr 16p13.11(14,796,083-16,535,551)x1 dn                                       | Ureterocele; Hydronephrosis - Moderate to Severe (AP > 10 mm); Echogenic kidney - Unilateral                                                                                                                                                                                      |
| Deletion    | 36                      | arr 17q12(31,474,734-33,323,031)x1 pat                                         | Polyhydramnios; Femur, Short - Bilateral; Humerus, Short - Bilateral; Congenital diaphragmatic hernia                                                                                                                                                                             |
| Deletion    | 33                      | arr 17p13.3(513-827,455)x1 mat                                                 | Polyhydramnios                                                                                                                                                                                                                                                                    |
| Deletion    | 34                      | arr 17p13.3p13.2(48,338-4,855,684)x1 dn // 21q22.3(43,364,146-46,912,090)x3 dn | Polyhydramnios; Bilateral Ventriculomegaly - Moderate                                                                                                                                                                                                                             |
| Deletion    | 12                      | arr 17q12(31,890,368-33,318,471)x1 dn                                          | Nuchal translucency - 3.7 mm                                                                                                                                                                                                                                                      |
| Duplication | 20                      | arr 17q12(32,041,983-33,135,410)x3 pat                                         | VSD; Talipes - Bilateral; Echogenic intracardiac focus                                                                                                                                                                                                                            |

Donnelly JC, Platt LD, Rebarber A, Zachary J, Grobman WA, and Wapner RJ. Association of copy number variants with specific ultrasonographically detected fetal anomalies. *Obstet Gynecol* 2014;124.

The authors provided this information as a supplement to their article.

| <b>Deletion</b> | <b>Gestational Age (Weeks)</b> | <b>ISCN Nomenclature</b>                                                         | <b>US Anomalies</b>                                                                                                          |
|-----------------|--------------------------------|----------------------------------------------------------------------------------|------------------------------------------------------------------------------------------------------------------------------|
| Deletion        | 20                             | arr 17q12(31,930,167-33,323,031)x1 dn                                            | Hydronephrosis - Mild (AP 5-10 mm); Echogenic kidney - Bilateral; Large kidney - Bilateral; Renal, other                     |
| Deletion        | 22                             | arr 17q12(31,501,499-33,678,831)x1 dn                                            | Echogenic kidney - Bilateral; Large kidney - Bilateral                                                                       |
| Deletion        | 14                             | arr 17q12(31,929,967-33,323,171)x1 dn                                            | Nuchal translucency - 3.5 mm                                                                                                 |
| Deletion        | 32                             | arr 19q13.32(52,174,243-52,869,532)x1 dn                                         | Coarctation; Agenesis of corpus collosum; Bilateral Ventriculomegaly - Moderate; Fetal growth restriction - < 5th percentile |
| Duplication     | 23                             | arr 19q13.42q13.43(59,640,794-61,566,588)x3 dn                                   | Coarctation                                                                                                                  |
| Duplication     | 21                             | arr 21q21.3(27,186,402-28,309,393)x3 mat                                         | Fetal growth restriction - < 5th percentile; Femur, Short - Bilateral; Humerus, Short - Bilateral; Echogenic bowel           |
| Deletion        | 11                             | arr 22q13.33(49,472,416-49,525,855)x1 dn                                         | CNS, other; Cystic hygroma                                                                                                   |
| Deletion        | 20                             | arr 22q11.21(17,041,723-19,835,418)x1 dn                                         | Tetralogy of Fallot; Heart, other; Hydronephrosis - Mild (AP 5-10 mm)                                                        |
| Deletion        | 19                             | arr 22q11.21(17,041,723-19,835,418)x1 dn                                         | Tetralogy of Fallot                                                                                                          |
| Duplication     | 12                             | arr 22q11.2(17,041,523-19,891,669)x3 mat // 15q13.3(29,817,814-30,297,358)x3 mat | Nuchal translucency - 5.9 mm                                                                                                 |
| Deletion        | 26                             | arr 22q11.21(19,084,421-19,835,417)x1 dn                                         | Cystic lung lesion                                                                                                           |
| Deletion        | 19                             | arr 22q11.21(17,299,741-19,835,557)x1 dn                                         | Truncus Arteriosus; Micrognathia; Anal atresia; Multicystic kidney - Unilateral                                              |
| Deletion        | 21                             | arr 22q11.21(19,411,059-19,835,557)x1 pat                                        | Tetralogy of Fallot; VSD                                                                                                     |

Donnelly JC, Platt LD, Rebarber A, Zachary J, Grobman WA, and Wapner RJ. Association of copy number variants with specific ultrasonographically detected fetal anomalies. *Obstet Gynecol* 2014;124.

The authors provided this information as a supplement to their article.

| <b>Deletion</b> | <b>Gestational Age (Weeks)</b> | <b>ISCN Nomenclature</b>                       | <b>US Anomalies</b>                                                                                                                                                                                                         |
|-----------------|--------------------------------|------------------------------------------------|-----------------------------------------------------------------------------------------------------------------------------------------------------------------------------------------------------------------------------|
| Deletion        | 21                             | arr 22q11.21(17,256,416-19,795,836)x1 dn       | Tetralogy of Fallot; Single effusion - Pleural; Choroid plexus cyst                                                                                                                                                         |
| Deletion        | 20                             | arr 22q11.21(17,085,800-19,891,669)x1 dn       | Hypoplastic right heart; Bilateral Ventriculomegaly - Severe; Femur, Short - Bilateral; Fibula, Short - Bilateral; Humerus, Short - Bilateral; Radius, Short - Bilateral; Tibia, Short - Bilateral; Ulna, Short - Bilateral |
| Deletion        | 22                             | arr 22q11.21(17,299,741-19,835,557)x1 dn       | Fetal growth restriction - < 5th percentile                                                                                                                                                                                 |
| Deletion        | 19                             | arr 22q11.21(17,299,941-19,835,417)x1 dn       | Hypoplastic left heart; Absent/hypoplastic nose bone; Multicystic kidney - Unilateral                                                                                                                                       |
| Deletion        | 20                             | arr 22q11.21(17,299,941-19,835,417)x1 dn       | Tetralogy of Fallot; Two vessel cord                                                                                                                                                                                        |
| Duplication     | 21                             | arr Xp11.1q11.1(57,307,607-61,734,924)x2 mat   | Bilateral Ventriculomegaly - Mild; Nuchal fold more or equal to 6mm; Neck, other; Sandal gap - Bilateral                                                                                                                    |
| Duplication     | 16                             | arr Xp22.13p22.12(18,498,513-19,414,777)x2 mat | Micrognathia; Choroid plexus cyst                                                                                                                                                                                           |
| Duplication     | 20                             | arr Yq11.223(22,650,981-23,984,067)x2 pat      | Bilateral Ventriculomegaly - Mild; Cleft Lip - Midline; Cleft Palate; Hypospadias; Rocker bottom foot - Bilateral; Clinodactyly - Bilateral; Talipes - Bilateral                                                            |
| Deletion        | 20                             | arr Yp11.2(6,652,867-8,894,823)x0 pat          | Talipes - Bilateral                                                                                                                                                                                                         |

Complete list of all 61 copy number variants included in this analysis with their associated ultrasound findings. Cases listed have at least one all anomaly, normal karyotype, and copy number variants by microarray.

Donnelly JC, Platt LD, Rebarber A, Zachary J, Grobman WA, and Wapner RJ. Association of copy number variants with specific ultrasonographically detected fetal anomalies. *Obstet Gynecol* 2014;124.

The authors provided this information as a supplement to their article.
